# Supplementary material for: Validating a dimension of doubt in decision-making: A proposed endophenotype for obsessive-compulsive disorder
Source: PubMed Central journal article supplement (PMC6564001; doi:10.1371/journal.pone.0218182), 2019-06-13

**S1 Figure A. Scree plot results of factor analysis of Doubt Questionnaire, in phase one internet participants (N=152)**

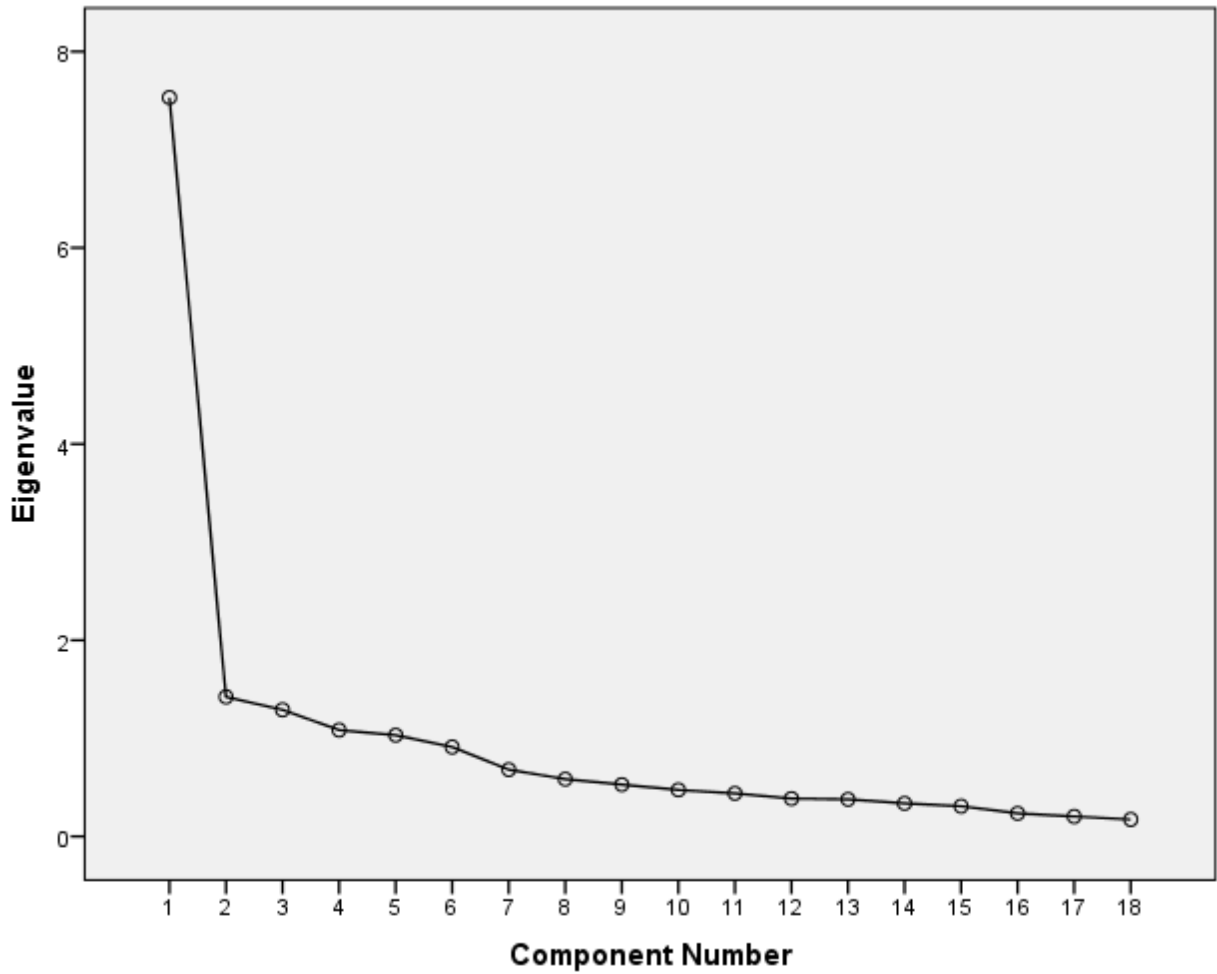

Supplement: pone.0218182.s001.pdf [file pone.0218182.s001.pdf]
