# Supplementary material for: Validating a dimension of doubt in decision-making: A proposed endophenotype for obsessive-compulsive disorder
Source: PubMed Central journal article supplement (PMC6564001; doi:10.1371/journal.pone.0218182), 2019-06-13
Supplement: pone.0218182.s002.pdf [file pone.0218182.s002.pdf]

**S2 Figure B. Classification of OCD status using Doubt Questionnaire doubt score, in OCD cases (N=67) and non-OCD controls (N=27)**

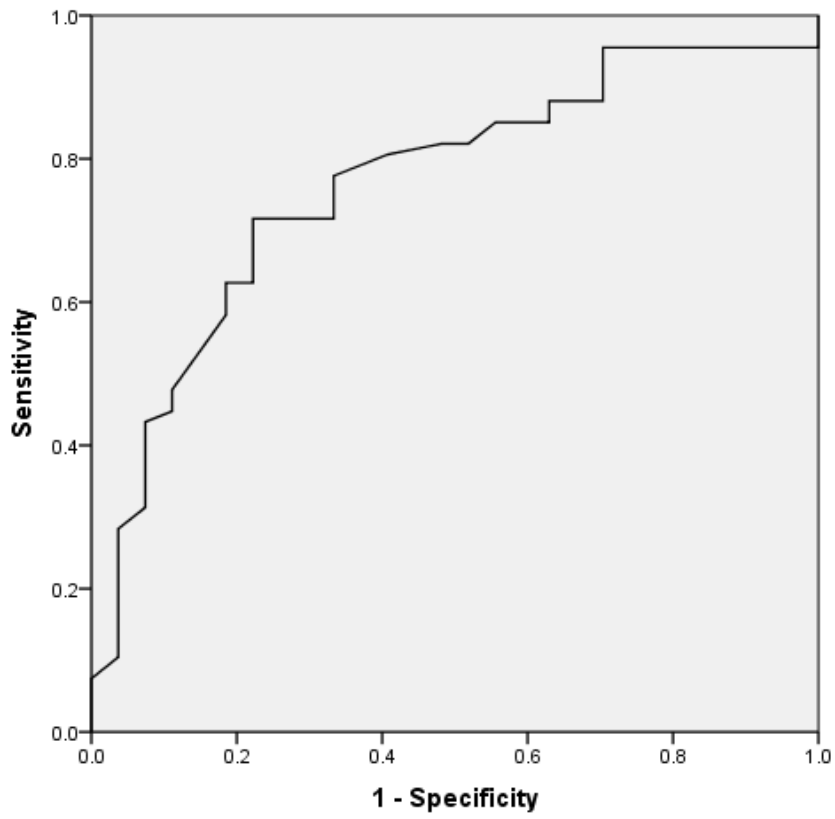

---

Area under the curve = 0.76 (95% CI=0.66-0.89),  $p < 0.001$ .
