# Supplementary material for: Validating a dimension of doubt in decision-making: A proposed endophenotype for obsessive-compulsive disorder
Source: PubMed Central journal article supplement (PMC6564001; doi:10.1371/journal.pone.0218182), 2019-06-13
Supplement: pone.0218182.s003.pdf [file pone.0218182.s003.pdf]

**S1 Table A. Doubt Questionnaire**

|     |                                                                                                                | Strongly disagree.....Strongly agree |   |   |   |   |
|-----|----------------------------------------------------------------------------------------------------------------|--------------------------------------|---|---|---|---|
| 1.  | I need to reassure myself that something I did was actually completed.                                         | 1                                    | 2 | 3 | 4 | 5 |
| 2.  | I am uncertain of my own recollections of what happened during an event.                                       | 1                                    | 2 | 3 | 4 | 5 |
| 3.  | I trust my own intuition.                                                                                      | 5                                    | 4 | 3 | 2 | 1 |
| 4.  | When faced with a dilemma, it is difficult to know my own opinion.                                             | 1                                    | 2 | 3 | 4 | 5 |
| 5.  | I question whether I'm sure of my facts.                                                                       | 1                                    | 2 | 3 | 4 | 5 |
| 6.  | I feel that I might have missed something because I didn't look carefully enough.                              | 1                                    | 2 | 3 | 4 | 5 |
| 7.  | When I do mental arithmetic, I doubt my answer.                                                                | 1                                    | 2 | 3 | 4 | 5 |
| 8.  | When I count items in a list, I feel like I might have missed one.                                             | 1                                    | 2 | 3 | 4 | 5 |
| 9.  | I don't trust my memory of simple, everyday things.                                                            | 1                                    | 2 | 3 | 4 | 5 |
| 10. | Even when I'm pretty sure about a memory, I start to doubt whether it's really correct.                        | 1                                    | 2 | 3 | 4 | 5 |
| 11. | I doubt my ability to remember accurately.                                                                     | 1                                    | 2 | 3 | 4 | 5 |
| 12. | I look at things a second time to be sure that I got an accurate look.                                         | 1                                    | 2 | 3 | 4 | 5 |
| 13. | It's easy for me to start doubting myself.                                                                     | 1                                    | 2 | 3 | 4 | 5 |
| 14. | It is difficult for me to skim through reading material because I doubt whether I really got the general idea. | 1                                    | 2 | 3 | 4 | 5 |
| 15. | I have to read each individual word in a sentence.                                                             | 1                                    | 2 | 3 | 4 | 5 |
| 16. | I second-guess my decisions.                                                                                   | 1                                    | 2 | 3 | 4 | 5 |
| 17. | Even when I do something very carefully, I often feel that it is not quite done right.                         | 1                                    | 2 | 3 | 4 | 5 |
| 18. | I usually have doubts about the simple everyday things I do.                                                   | 1                                    | 2 | 3 | 4 | 5 |

Doubt score is the sum of the ratings for the 18 items. Note that item 3 is reverse coded.
